# Supplementary material for: Contralateral and Ipsilateral Interactions in the Somatosensory Pathway in Healthy Humans
Source: Frontiers journal article supplement (doi:10.3389/fnsys.2021.698758), 2021-08-17
Supplement: Data_Sheet_1.PDF [file Data_Sheet_1.PDF]

## Supplementary figures

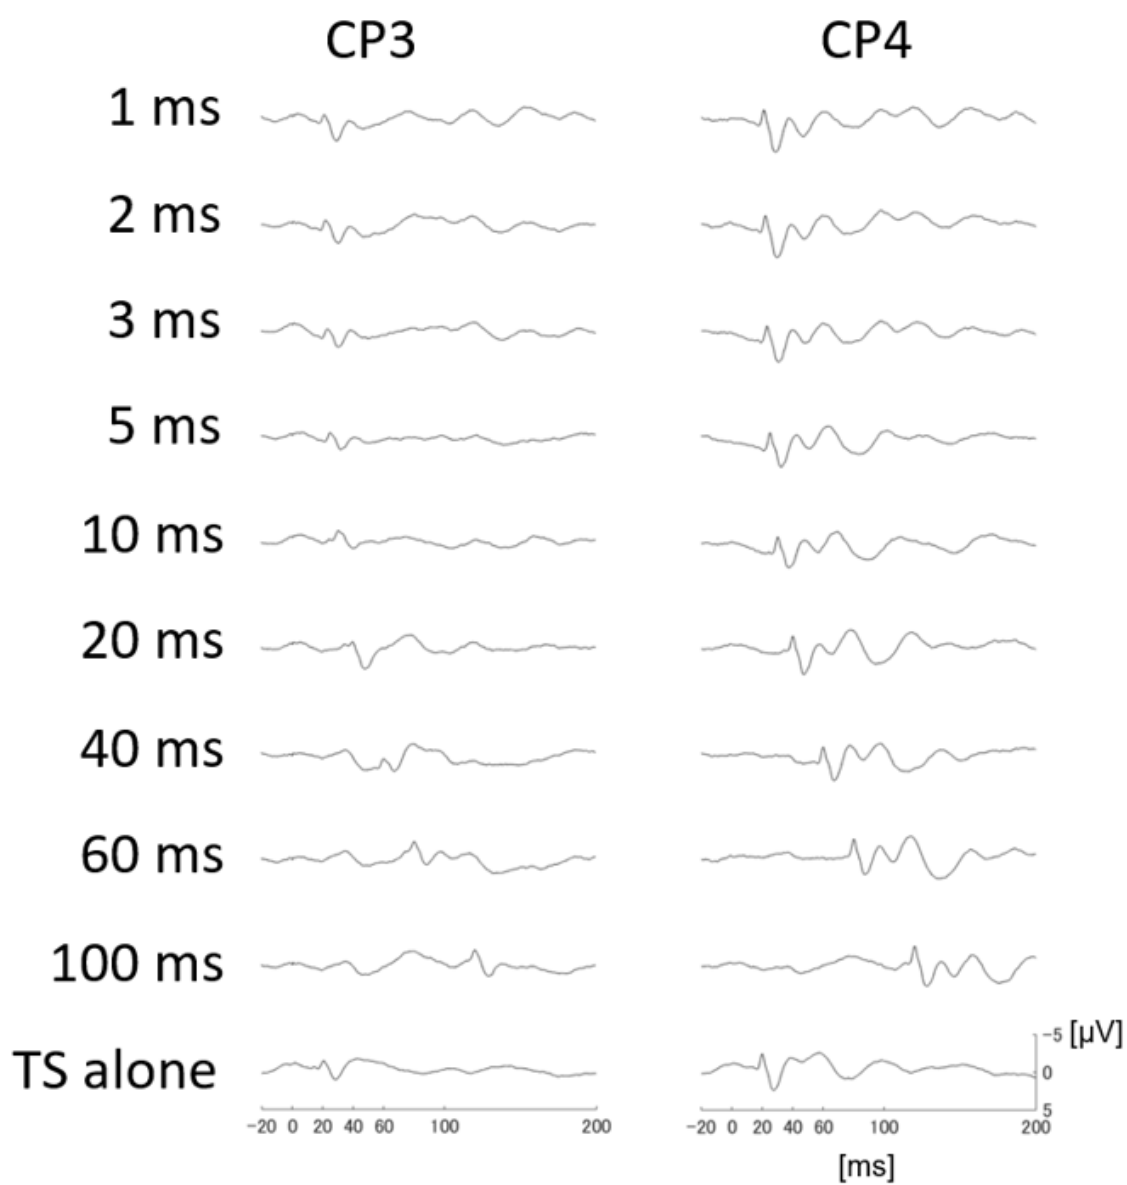

**Figure S1**

The s-SEP (TS alone) and the analyzed p-SEPs (s-SEP subtracted) (ISIs; 1, 2, 3, 5, 10, 20, 40, 60, 100 ms) waveforms at CP3 and CP4 from the Subject 1.

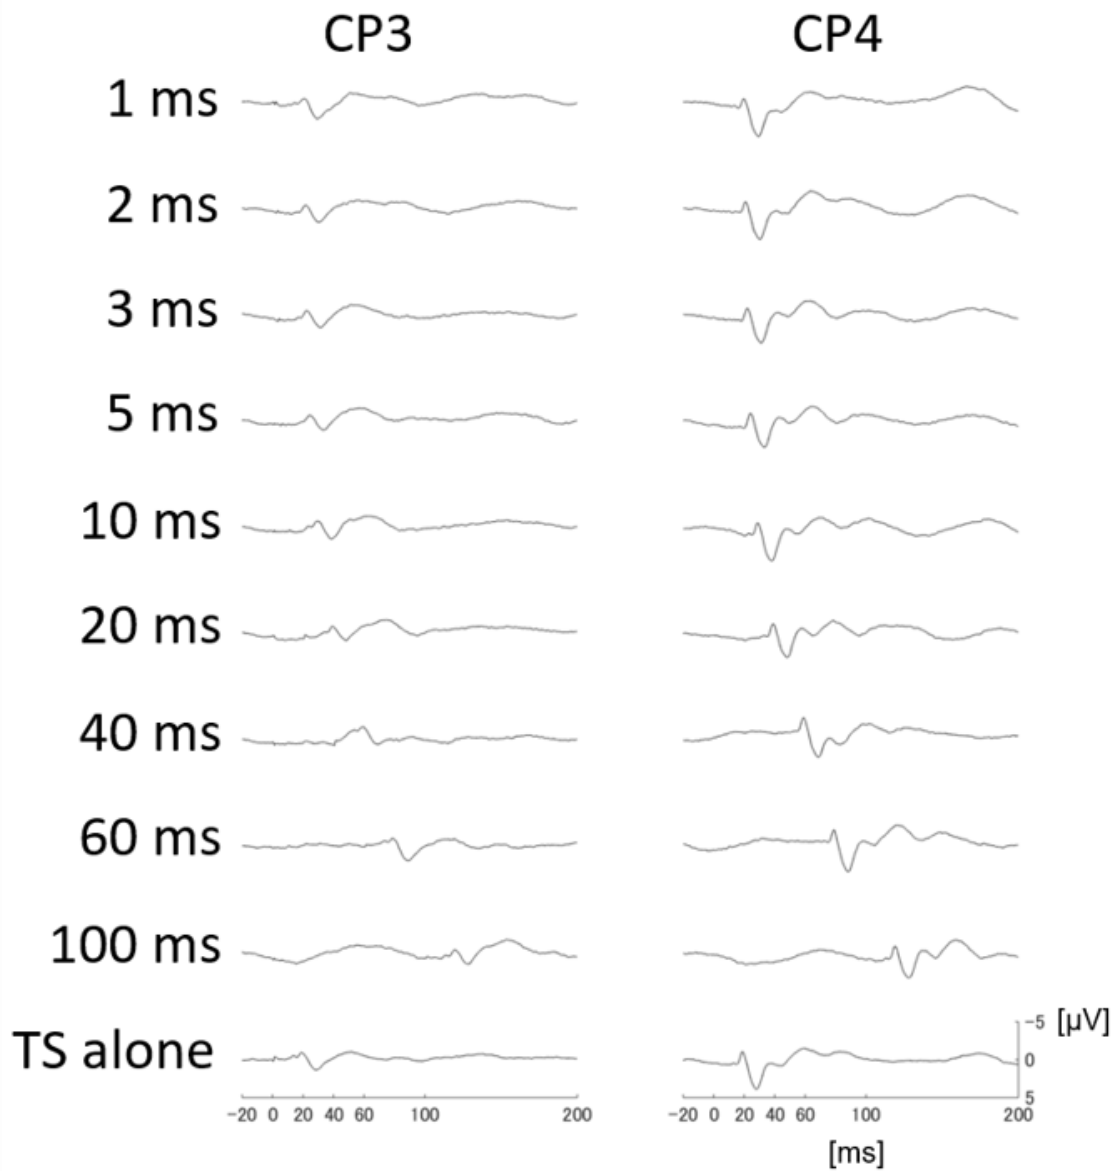

**Figure S2**

The s-SEP (TS alone) and the analyzed p-SEPs (s-SEP subtracted) (ISIs; 1, 2, 3, 5, 10, 20, 40, 60, 100 ms) waveforms at CP3 and CP4 from the Subject 2.

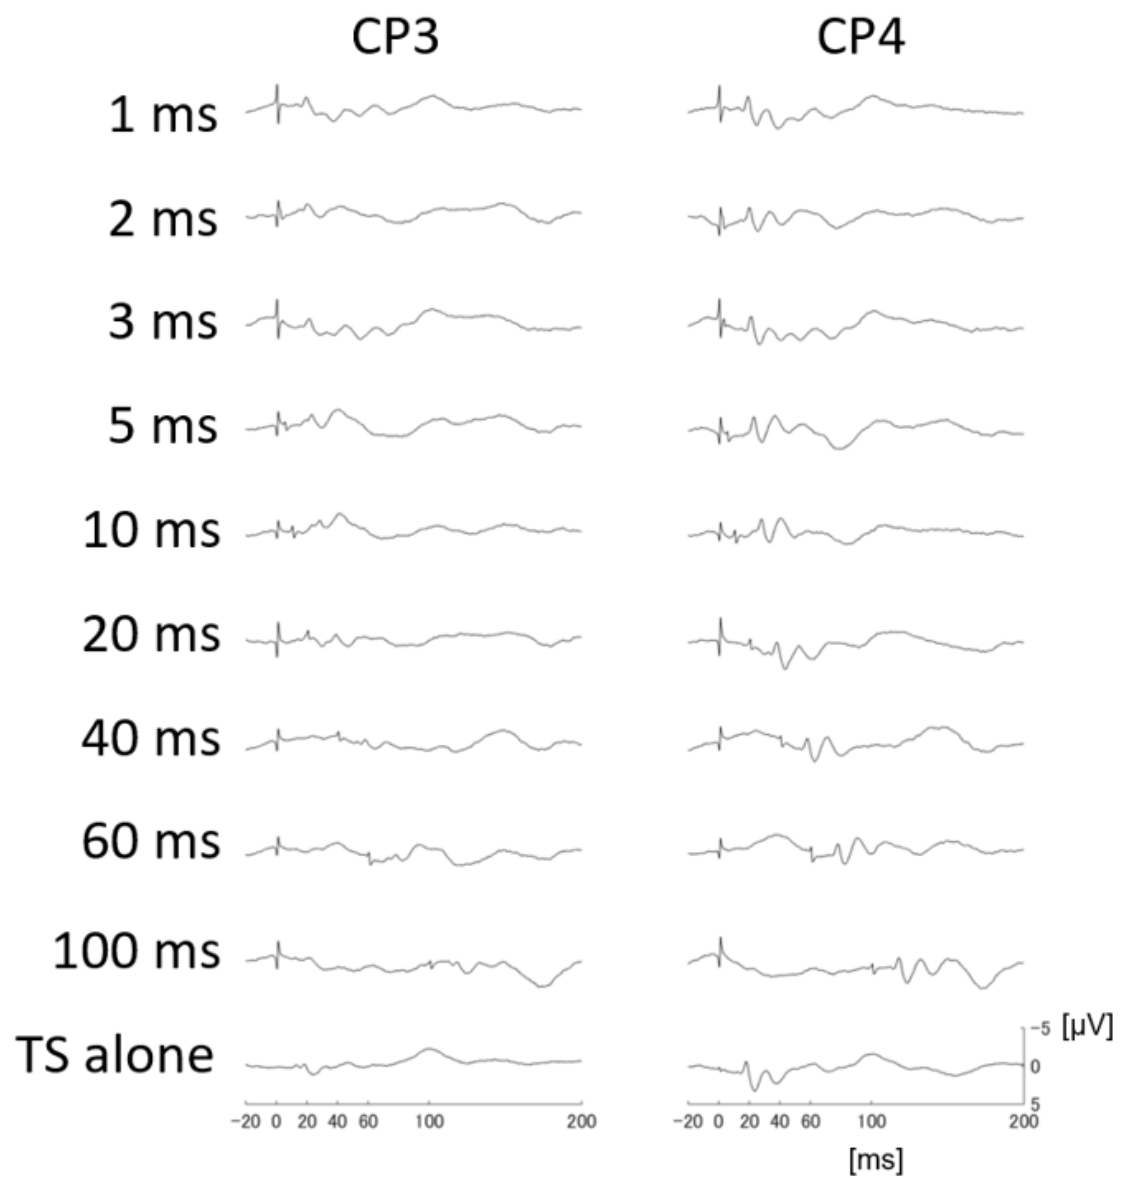

**Figure S3**

The s-SEP (TS alone) and the analyzed p-SEPs (s-SEP subtracted) (ISIs; 1, 2, 3, 5, 10, 20, 40, 60, 100 ms) waveforms at CP3 and CP4 from the Subject 3.

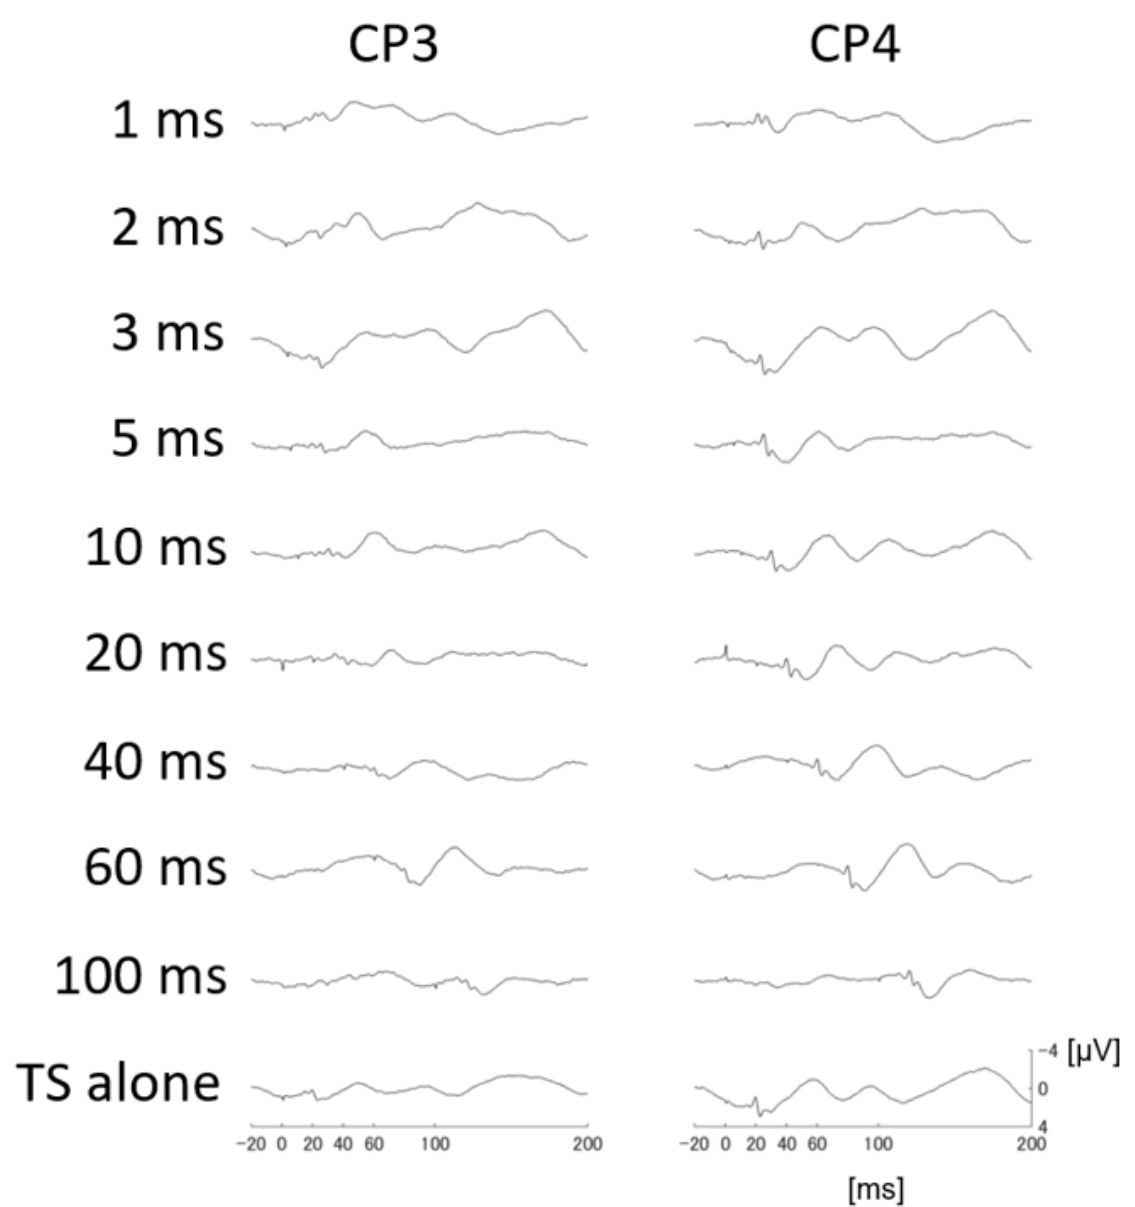

**Figure S4**

The s-SEP (TS alone) and the analyzed p-SEPs (s-SEP subtracted) (ISIs; 1, 2, 3, 5, 10, 20, 40, 60, 100 ms) waveforms at CP3 and CP4 from the Subject 4.

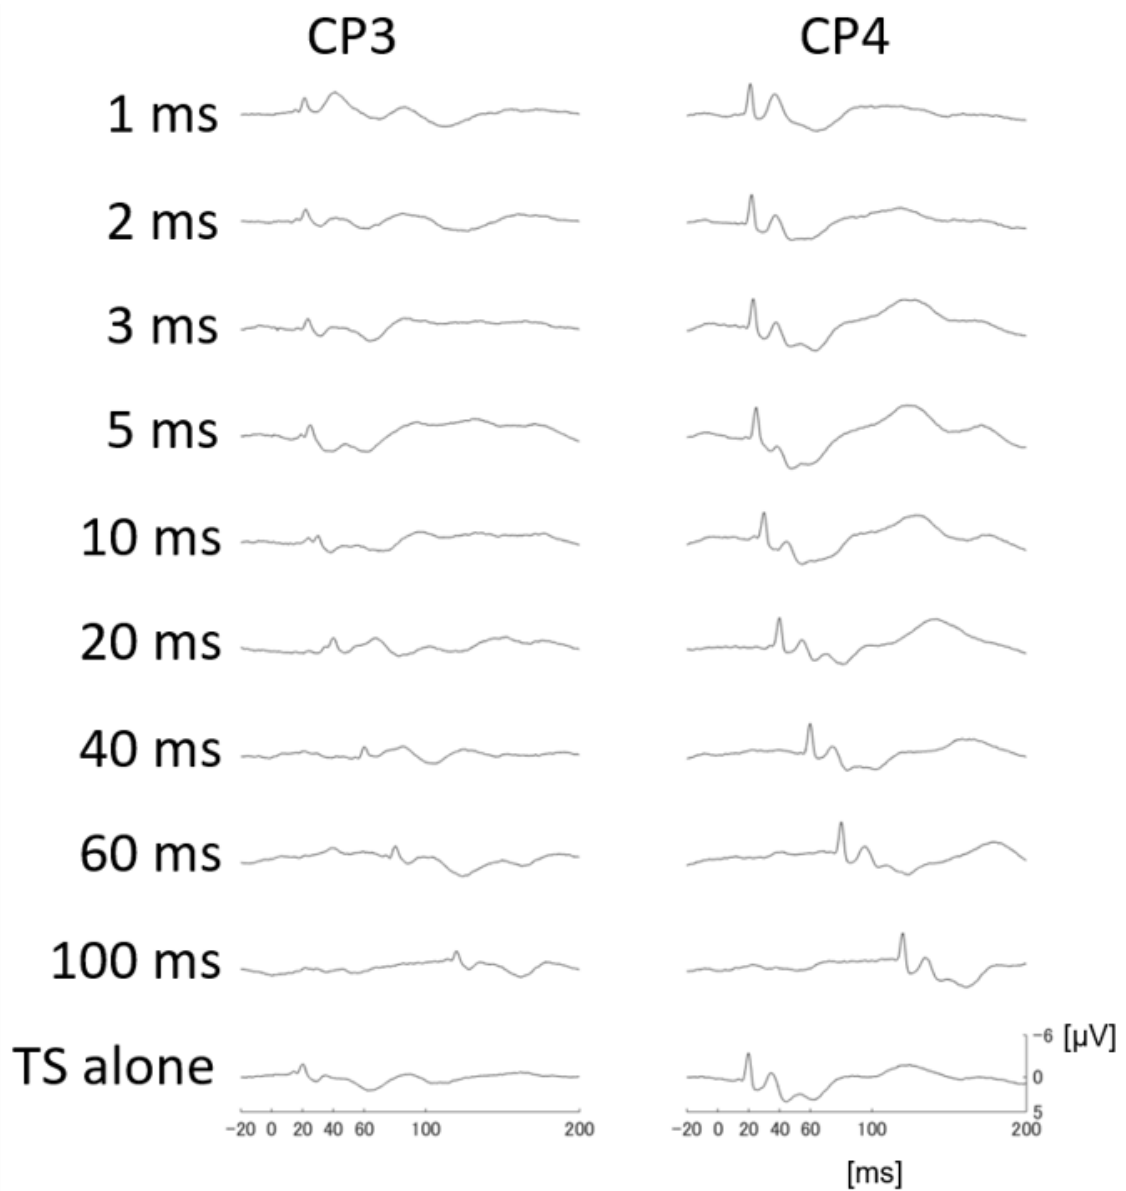

**Figure S5**

The s-SEP (TS alone) and the analyzed p-SEPs (s-SEP subtracted) (ISIs; 1, 2, 3, 5, 10, 20, 40, 60, 100 ms) waveforms at CP3 and CP4 from the Subject 5.

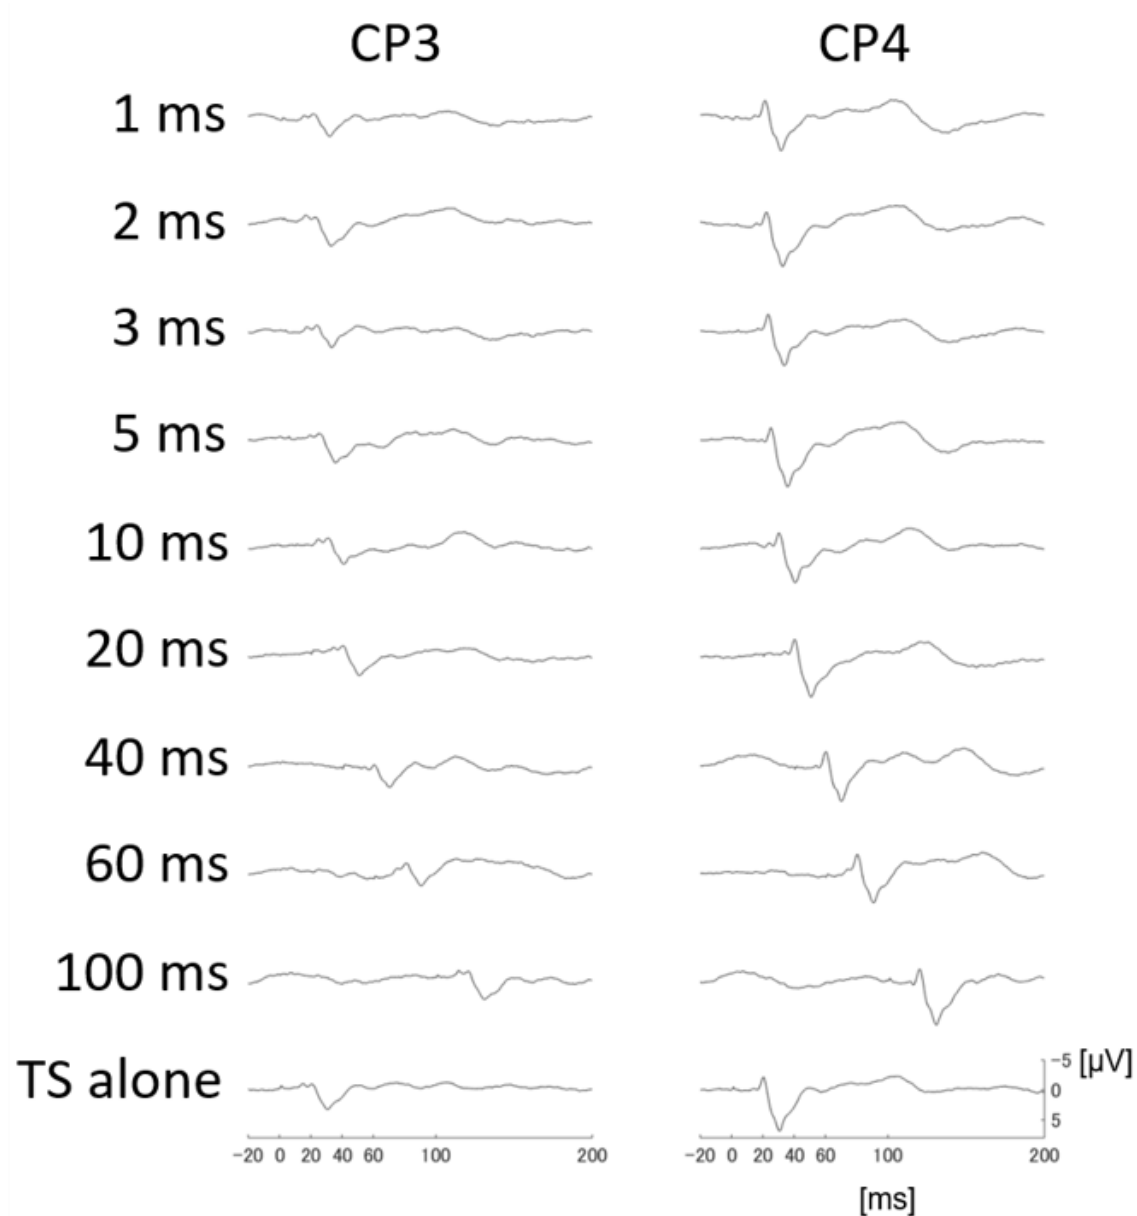

**Figure S6**

The s-SEP (TS alone) and the analyzed p-SEPs (s-SEP subtracted) (ISIs; 1, 2, 3, 5, 10, 20, 40, 60, 100 ms) waveforms at CP3 and CP4 from the Subject 6.

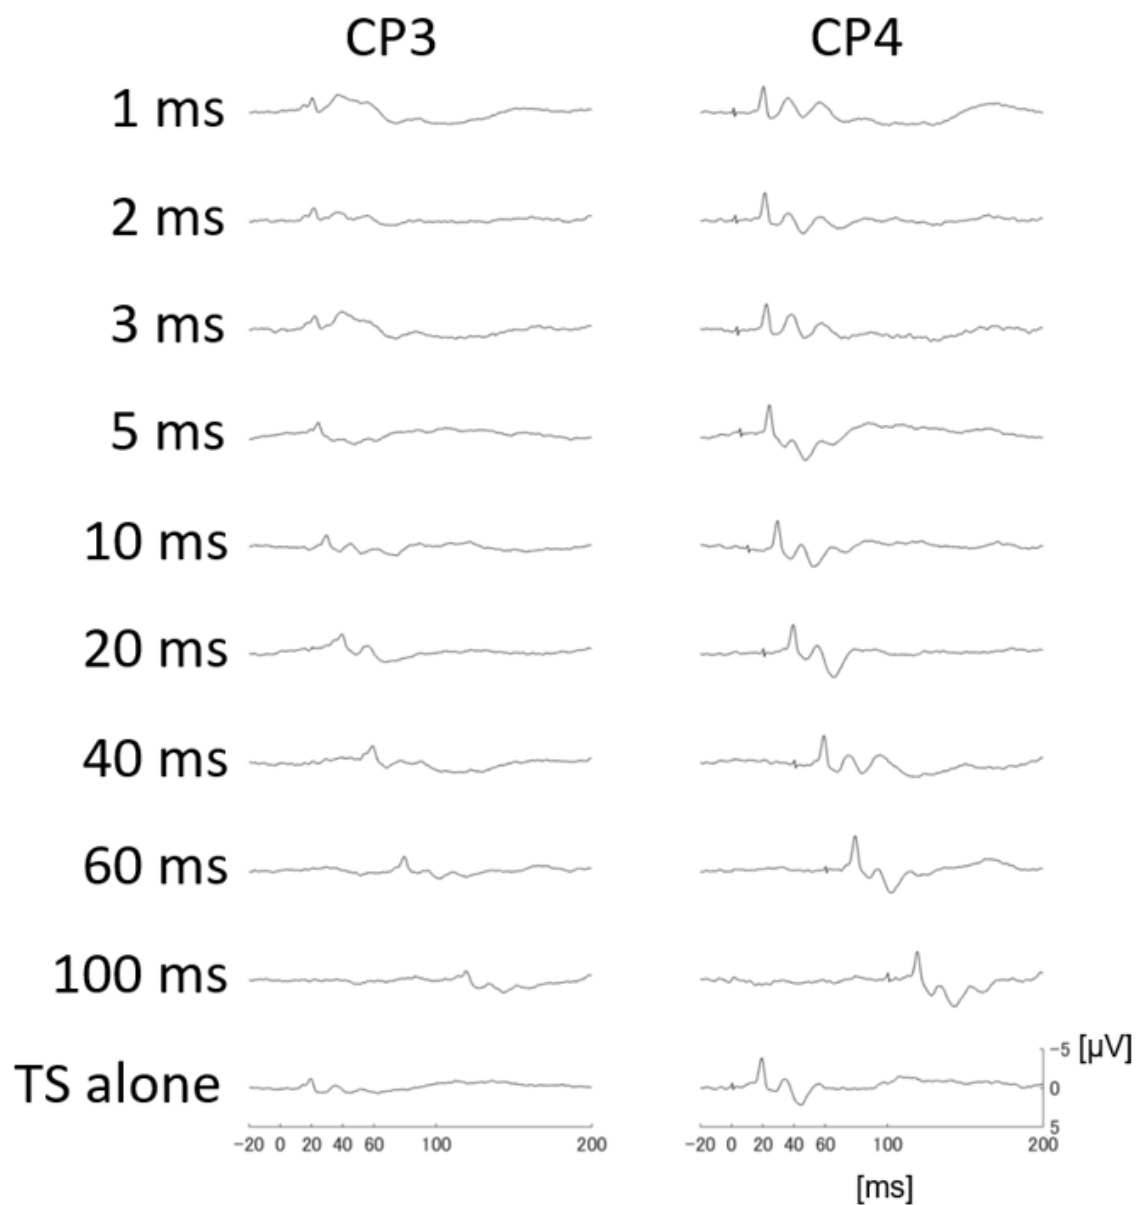

**Figure S7**

The s-SEP (TS alone) and the analyzed p-SEPs (s-SEP subtracted) (ISIs; 1, 2, 3, 5, 10, 20, 40, 60, 100 ms) waveforms at CP3 and CP4 from the Subject 7.

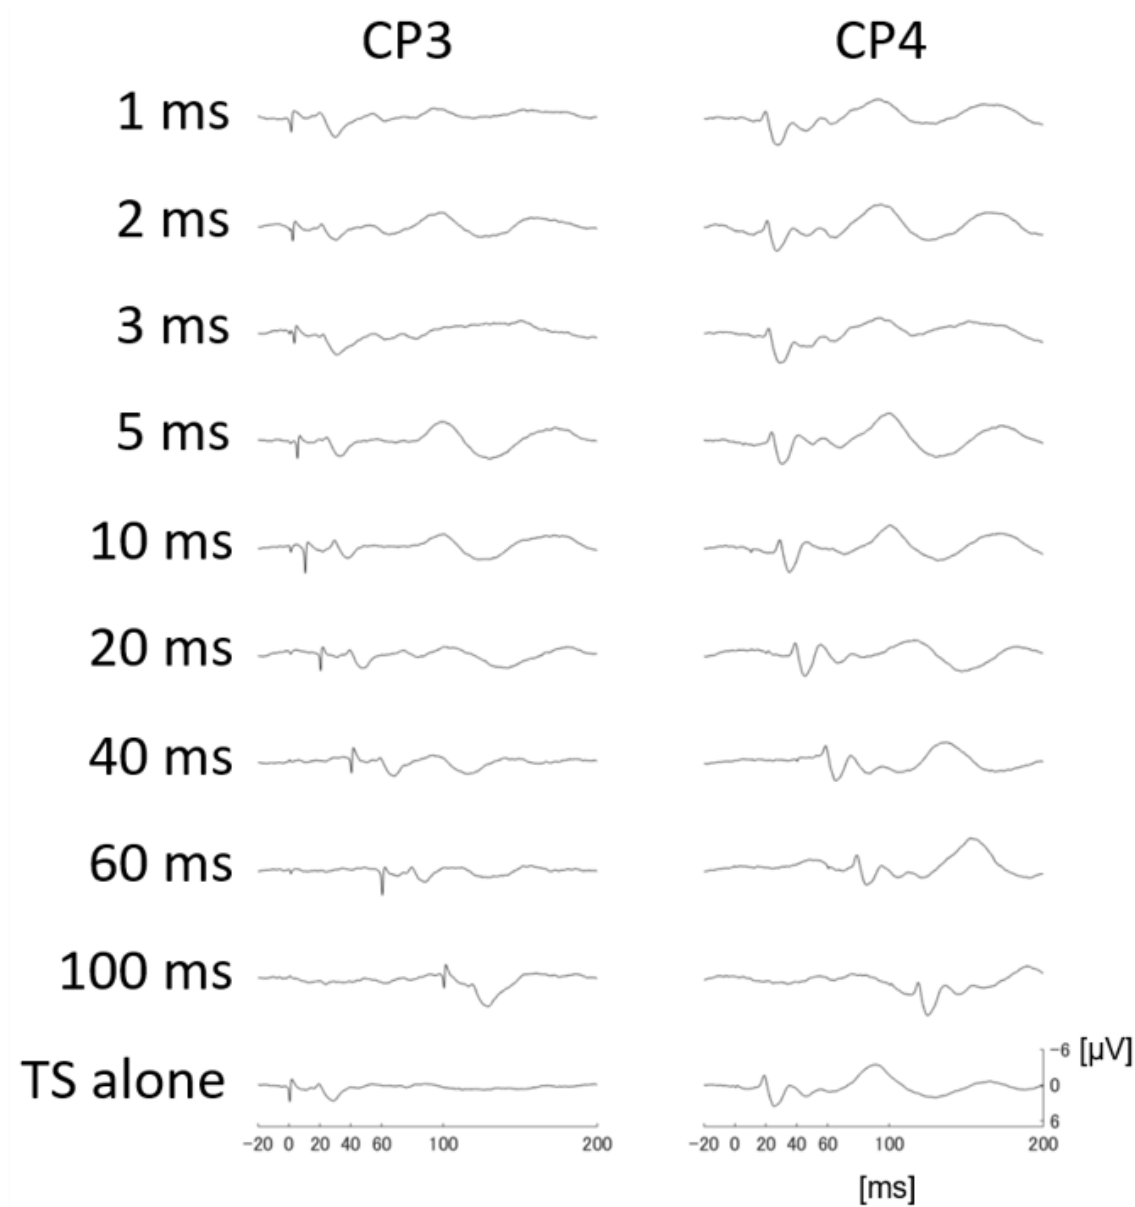

**Figure S8**

The s-SEP (TS alone) and the analyzed p-SEPs (s-SEP subtracted) (ISIs; 1, 2, 3, 5, 10, 20, 40, 60, 100 ms) waveforms at CP3 and CP4 from the Subject 8.



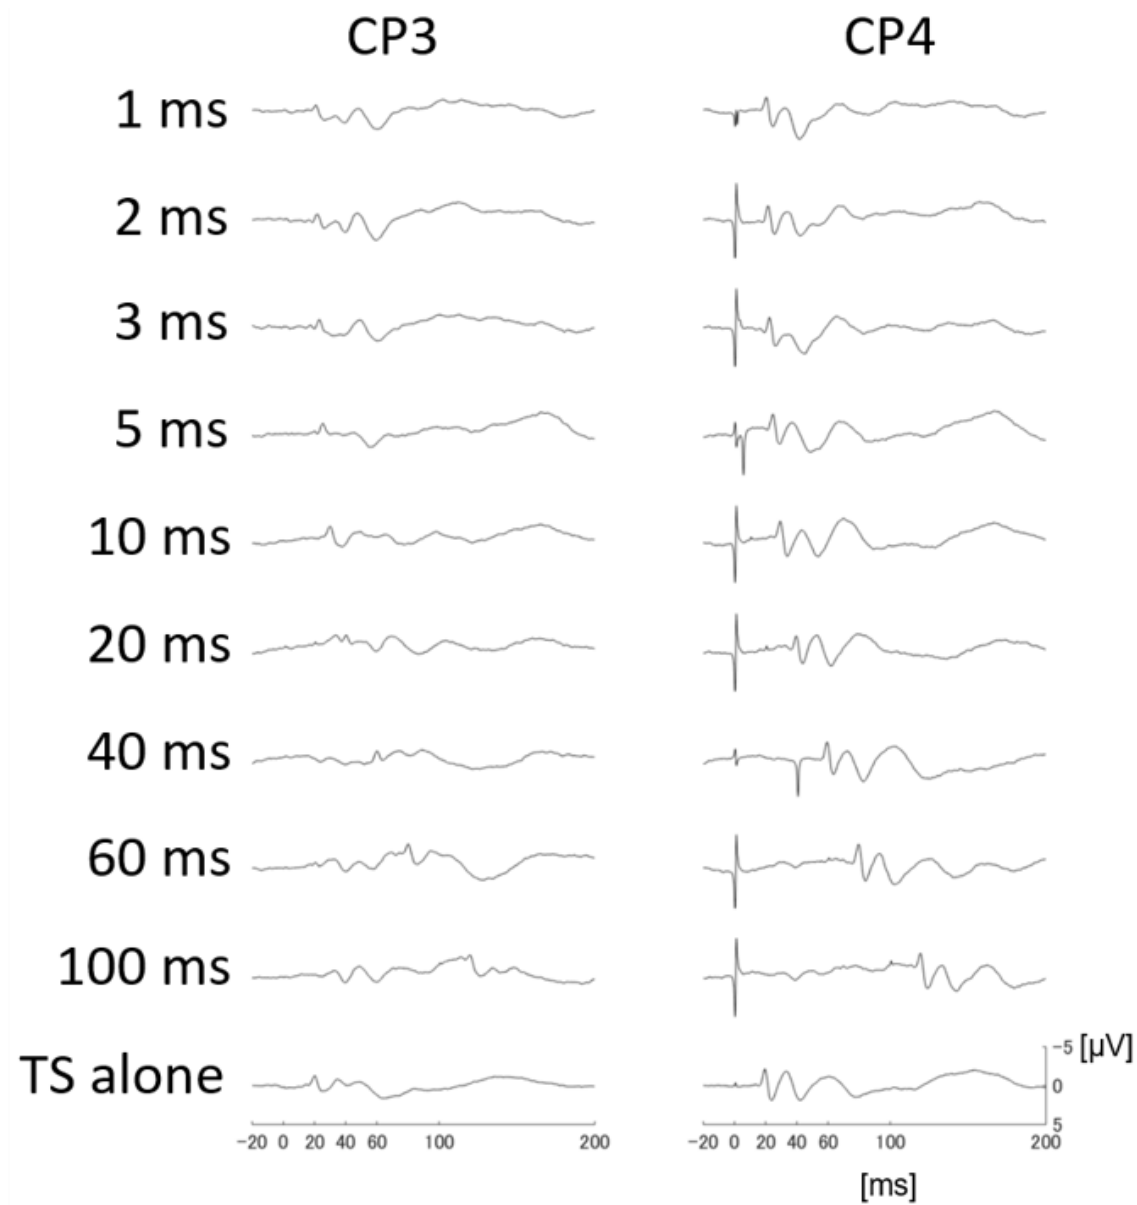

**Figure S9**

The s-SEP (TS alone) and the analyzed p-SEPs (s-SEP subtracted) (ISIs; 1, 2, 3, 5, 10, 20, 40, 60, 100 ms) waveforms at CP3 and CP4 from the Subject 9.

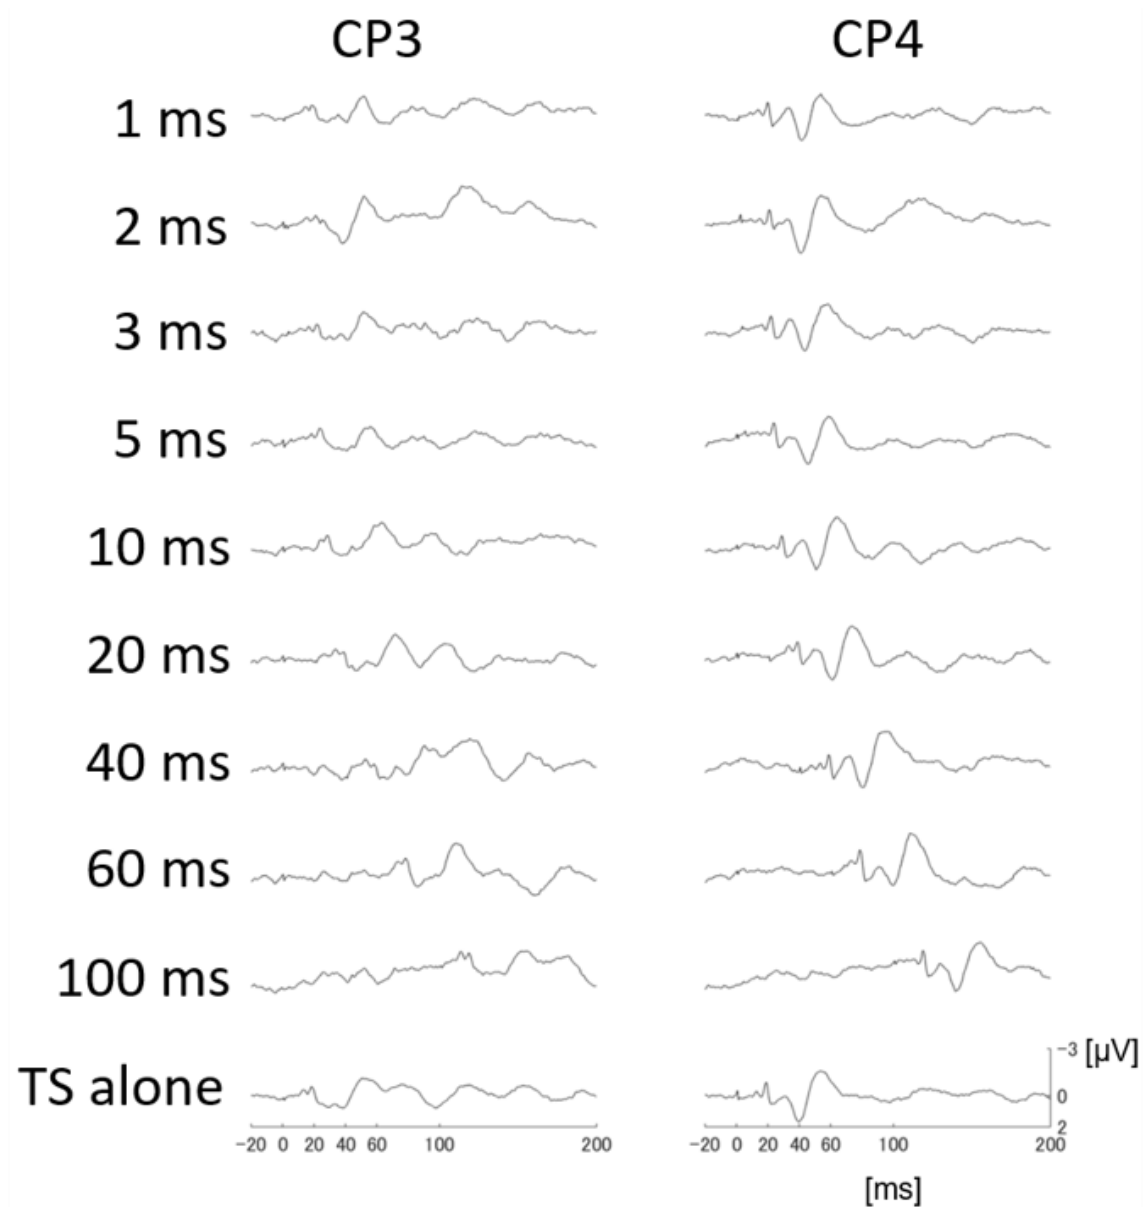

**Figure S10**

The s-SEP (TS alone) and the analyzed p-SEPs (s-SEP subtracted) (ISIs; 1, 2, 3, 5, 10, 20, 40, 60, 100 ms) waveforms at CP3 and CP4 from the Subject 10.

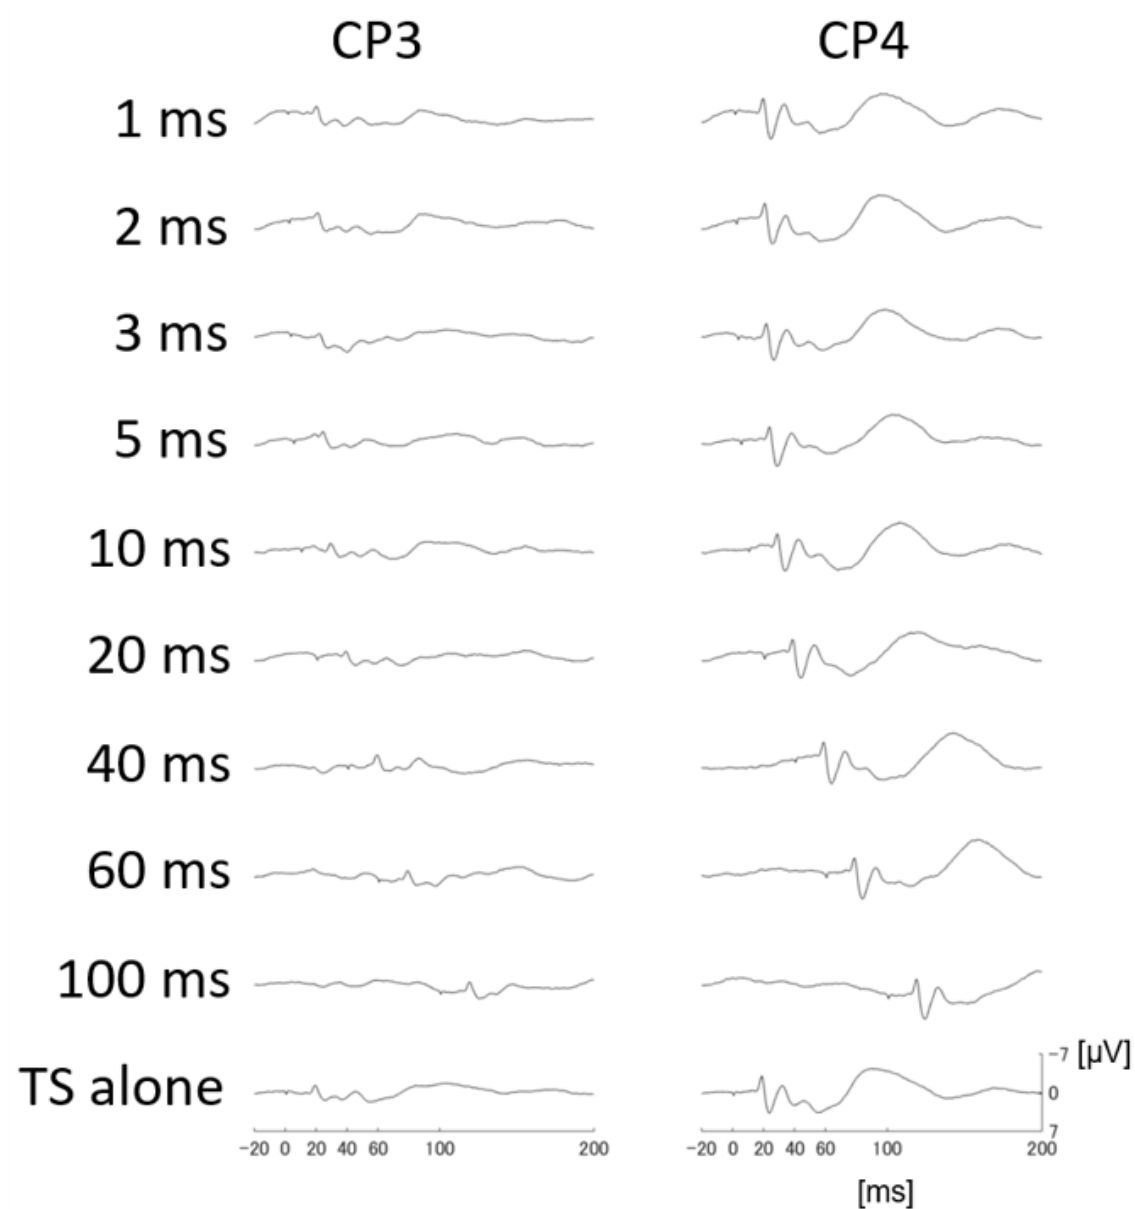

**Figure S11**

The s-SEP (TS alone) and the analyzed p-SEPs (s-SEP subtracted) (ISIs; 1, 2, 3, 5, 10, 20, 40, 60, 100 ms) waveforms at CP3 and CP4 from the Subject 11.

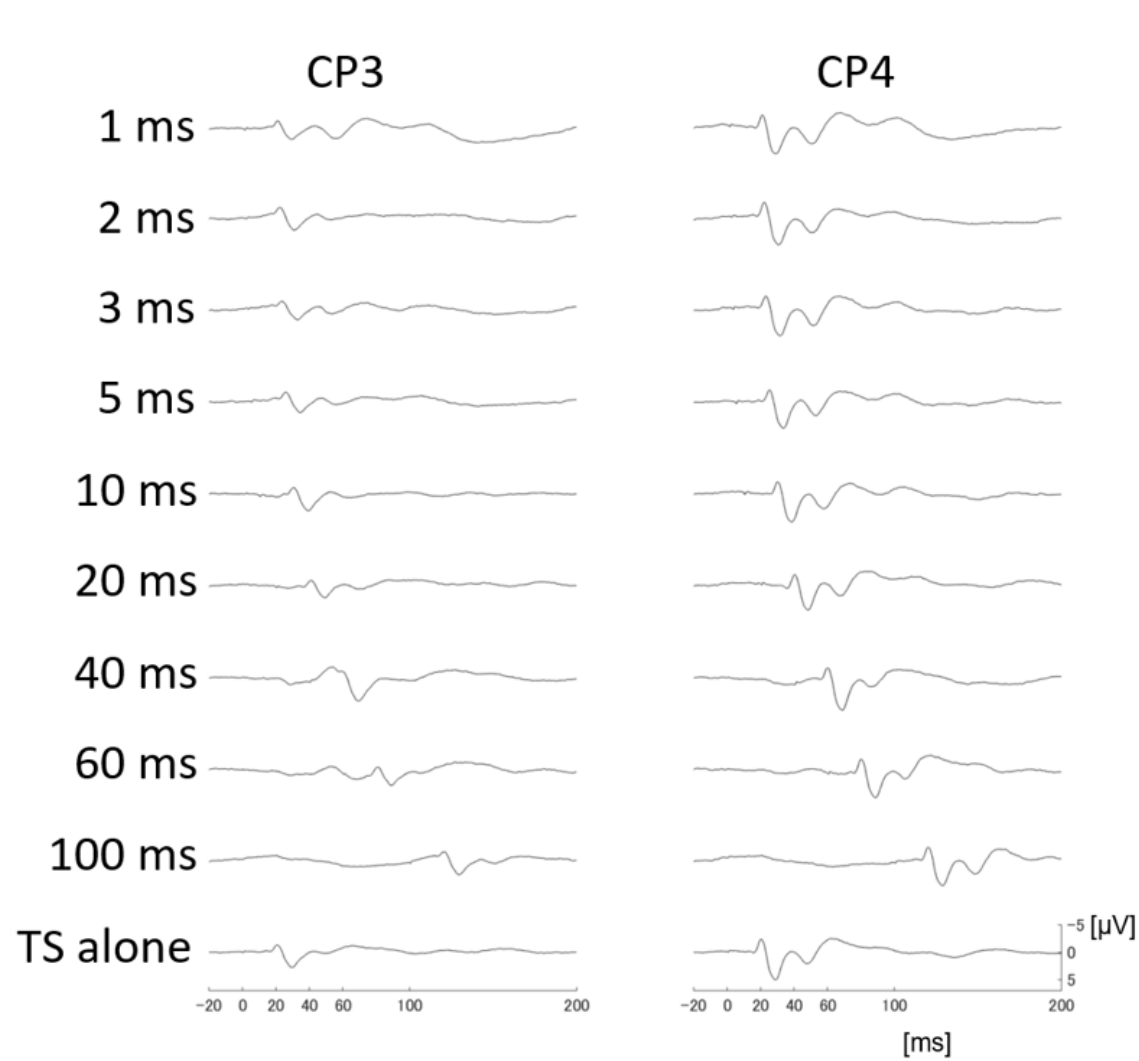

**Figure S12**

The s-SEP (TS alone) and the analyzed p-SEPs (s-SEP subtracted) (ISIs; 1, 2, 3, 5, 10, 20, 40, 60, 100 ms) waveforms at CP3 and CP4 from the Subject 12.

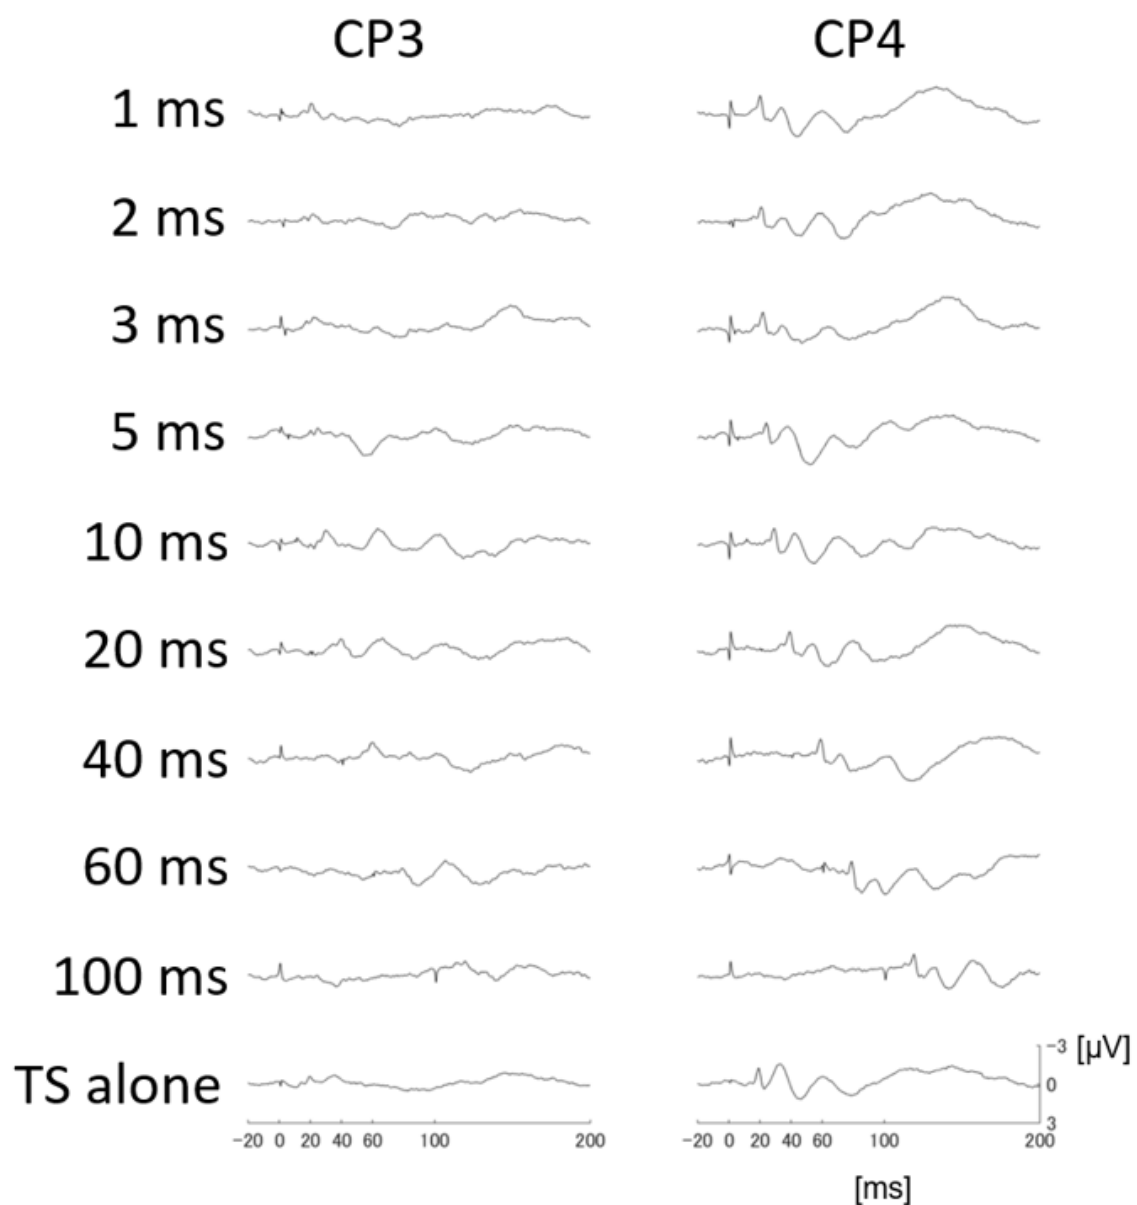

**Figure S13**

The s-SEP (TS alone) and the analyzed p-SEPs (s-SEP subtracted) (ISIs; 1, 2, 3, 5, 10, 20, 40, 60, 100 ms) waveforms at CP3 and CP4 from the Subject 13.

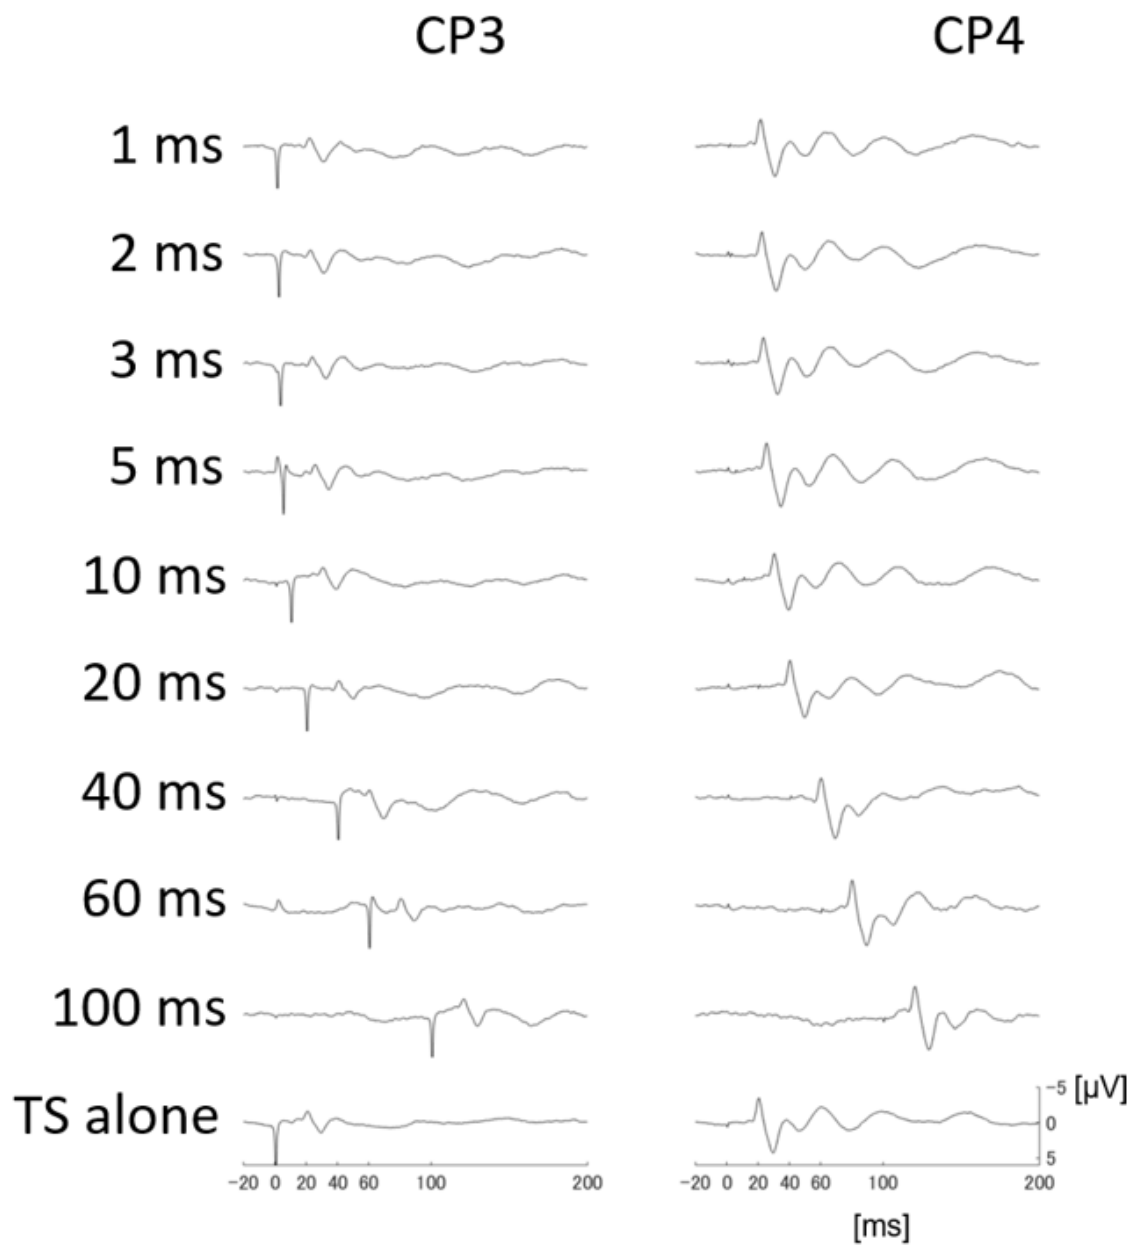

**Figure S14**

The s-SEP (TS alone) and the analyzed p-SEPs (s-SEP subtracted) (ISIs; 1, 2, 3, 5, 10, 20, 40, 60, 100 ms) waveforms at CP3 and CP4 from the Subject 14.
